# Supplementary material
Source: publisher figshare collection journal article supplement (https://diabetesjournals.figshare.com/ndownloader/files/25867149)
Supplement: Supplementary file 1 [file 25867149]

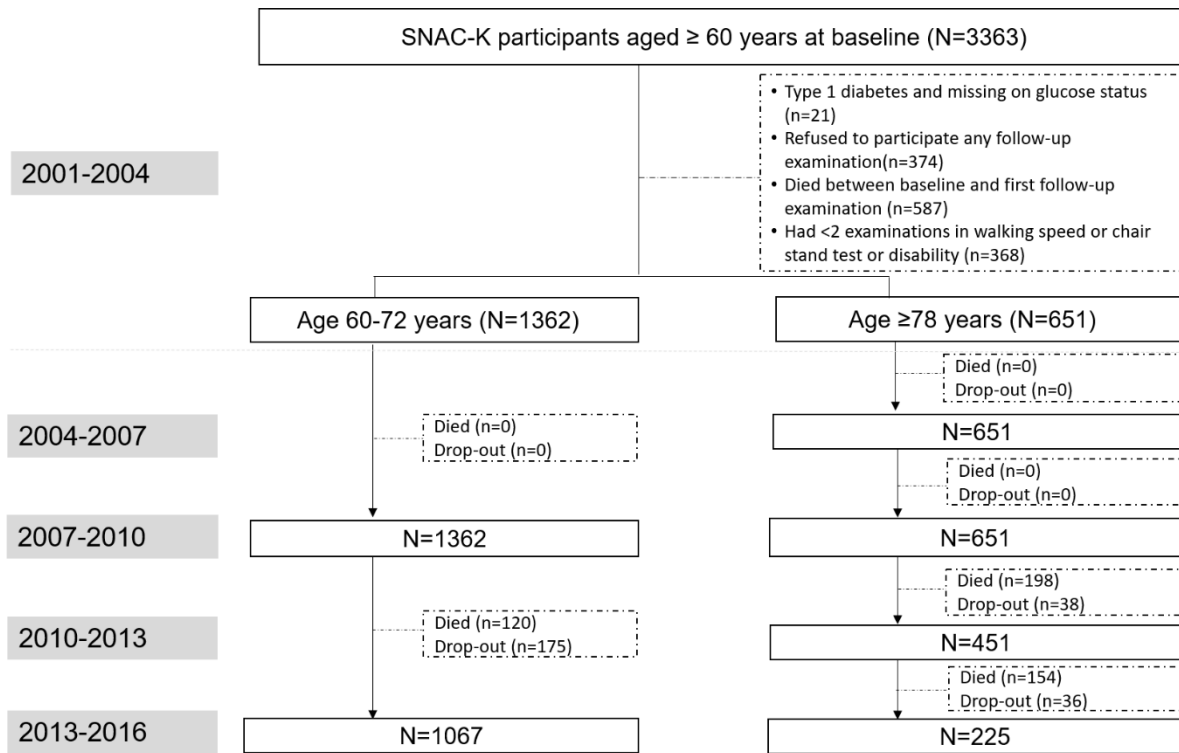

**Supplementary Figure 1.** Flowchart of the study population

**Supplementary Table 1.** Baseline characteristics of those include in the study sample and those not

| <b>Characteristics</b>                      | <b>Study sample<br/>(n=2013)</b> | <b>Individuals excluded<br/>from the study<br/>(n=1350)</b> | <b>P-value</b> |
|---------------------------------------------|----------------------------------|-------------------------------------------------------------|----------------|
| Age (years)                                 | 71 ( $\pm$ 9.3)                  | 81 ( $\pm$ 11.2)                                            | <0.001         |
| 60-78 years                                 | 1362 (67.7)                      | 427 (31.6)                                                  | <0.001         |
| $\geq$ 78 years                             | 651 (32.3)                       | 923 (68.4)                                                  |                |
| Female sex                                  | 1273 (63.2)                      | 900 (67.7)                                                  | 0.008          |
| Living in institutions                      | 19 (0.94)                        | 176 (13.0)                                                  | <0.001         |
| Education $\geq$ elementary                 | 1763 (87.8)                      | 961 (73.9)                                                  | <0.001         |
| Body mass index (kg/m <sup>2</sup> )        | 25 ( $\pm$ 3.8)                  | 24 ( $\pm$ 4.6)                                             | <0.001         |
| Smoking status                              |                                  |                                                             | 0.006          |
| Never smoker                                | 924 (46.3)                       | 629 (49.7)                                                  |                |
| Former smoker                               | 803 (40.2)                       | 440 (34.9)                                                  |                |
| Current smoker                              | 269 (13.5)                       | 196 (15.5)                                                  |                |
| Alcohol consumption                         |                                  |                                                             | <0.001         |
| No or occasional                            | 553 (27.6)                       | 676 (53.4)                                                  |                |
| Light to moderate                           | 1089 (54.4)                      | 438 (34.6)                                                  |                |
| Heavy                                       | 359 (17.9)                       | 151 (11.9)                                                  |                |
| Physically active                           | 1572 (78.1)                      | 628 (46.5)                                                  | <0.001         |
| MMSE score                                  | 28 ( $\pm$ 2.3)                  | 24 ( $\pm$ 7.9)                                             | <0.001         |
| SBP (mm Hg)                                 | 143 ( $\pm$ 19.4)                | 141 ( $\pm$ 21.9)                                           | 0.008          |
| DBP (mm Hg)                                 | 82 ( $\pm$ 10.4)                 | 77 ( $\pm$ 11.8)                                            | <0.001         |
| Hypertension                                | 1465 (72.8)                      | 1024 (77.1)                                                 | 0.006          |
| High cholesterol                            | 1061 (54.1)                      | 453 (40.7)                                                  | <0.001         |
| Estimated GFR (mL/min/1.73 m <sup>2</sup> ) | 67 ( $\pm$ 12.5)                 | 59 ( $\pm$ 16.5)                                            | <0.001         |
| Diabetes status                             |                                  |                                                             | 0.006          |
| Normoglycemia                               | 1212 (60.2)                      | 760 (57.2)                                                  |                |
| Prediabetes                                 | 650 (32.3)                       | 427 (32.2)                                                  |                |
| Diabetes                                    | 151 (7.5)                        | 141 (10.6)                                                  |                |
| Depression and mood disorders               | 158 (7.85)                       | 152 (11.3)                                                  | 0.001          |

|                                   |                  |                  |        |
|-----------------------------------|------------------|------------------|--------|
| Cerebrovascular disease           | 90 (4.47)        | 175 (12.9)       | <0.001 |
| Peripheral neuropathy             | 29 (1.44)        | 20 (1.48)        | 0.923  |
| Number of cardiovascular diseases |                  |                  | <0.001 |
| 0                                 | 1644 (81.7)      | 787 (58.3)       |        |
| 1                                 | 249 (12.4)       | 308 (22.8)       |        |
| 2+                                | 120 (5.96)       | 255 (18.9)       |        |
| Chair stand (s)                   | 21 ( $\pm$ 21.4) | 42 ( $\pm$ 30.3) | <0.001 |
| Walking speed (m/s)               | 1.1 ( $\pm$ 0.4) | 0.7 ( $\pm$ 0.4) | <0.001 |
| ADL disability <sup>#</sup>       | 46 (2.29)        | 276 (20.7)       | <0.001 |
| IADL disability <sup>¤</sup>      | 181 (9.2)        | 584 (45.7)       | <0.001 |

Data are n (%) or means  $\pm$  SD.

Abbreviations: MMSE, Mini-Mental State Examination; SBP, systolic blood pressure; DBP, diastolic blood pressure; GFR, glomerular filtration rate; ADL, activity of daily living; IADL, instrumental activity of daily living.

<sup>#</sup>At least one impairment in ADL.

<sup>¤</sup>At least one impairment in IADL.

**Supplementary Table 2.** Main analysis stratified by age groups

## 1. Outcome: Chair stand

| Glycemic status × time | 60-78y      |                     | ≥78y      |               |
|------------------------|-------------|---------------------|-----------|---------------|
|                        | Beta        | 95% CI              | Beta      | 95% CI        |
| Normoglycemia × time   | Reference   |                     | Reference |               |
| Prediabetes × time     | -0.03       | -0.31 to 0.24       | 0.19      | -0.37 to 0.76 |
| Diabetes × time        | <b>1.13</b> | <b>0.49 to 1.77</b> | 0.22      | -0.94 to 1.38 |
| Controlled × time      | <b>0.95</b> | <b>0.18 to 1.72</b> | 0.01      | -1.23 to 1.24 |
| Uncontrolled × time    | <b>1.57</b> | <b>1.57 to 0.49</b> | 1.26      | -1.68 to 4.21 |

## 2. Outcome: Walking speed

| Glycemic status × time | 60-78y        |                         | ≥78y      |                 |
|------------------------|---------------|-------------------------|-----------|-----------------|
|                        | Beta          | 95% CI                  | Beta      | 95% CI          |
| Normoglycemia × time   | Reference     |                         | Reference |                 |
| Prediabetes × time     | -0.002        | -0.005 to 0.002         | -0.003    | -0.010 to 0.003 |
| Diabetes × time        | <b>-0.013</b> | <b>-0.021 to -0.004</b> | 0.007     | -0.004 to 0.020 |
| Controlled × time      | <b>-0.011</b> | <b>-0.012 to -0.001</b> | 0.011     | -0.001 to 0.024 |
| Uncontrolled × time    | <b>-0.017</b> | <b>-0.032 to -0.002</b> | -0.010    | -0.040 to 0.022 |

## 3. Outcome: Disability score

| Glycemic status × time | 60-78y      |                     | ≥78y      |               |
|------------------------|-------------|---------------------|-----------|---------------|
|                        | Beta        | 95% CI              | Beta      | 95% CI        |
| Normoglycemia × time   | Reference   |                     | Reference |               |
| Prediabetes × time     | 0.02        | -0.01 to 0.04       | 0.002     | -0.08 to 0.09 |
| Diabetes × time        | <b>0.11</b> | <b>0.04 to 0.18</b> | 0.088     | -0.09 to 0.27 |
| Controlled × time      | <b>0.11</b> | <b>0.03 to 0.19</b> | 0.003     | -0.17 to 0.17 |
| Uncontrolled × time    | <b>0.11</b> | <b>0.01 to 0.26</b> | 0.418     | -0.06 to 0.90 |

Models were adjusted for baseline age, sex, education, body mass index, physical activity, alcohol consumption, smoking status, systolic blood pressure, high total cholesterol, estimated glomerular filtration rate, depression and mood disorders, cerebrovascular disease, and peripheral neuropathy. For prediabetes as exposures, models were additionally adjusted for incident diabetes. Numbers in bold indicate p value <0.05.

**Supplementary Table 3.**  $\beta$ -coefficients and 95% confidence intervals (95% CIs) of glycemc status in relation to cardiovascular diseases accumulation over 6 years using mixed-effect models

|                              | Model 1                      | Model 2                      |
|------------------------------|------------------------------|------------------------------|
|                              | $\beta$ (95% CI)             | $\beta$ (95% CI)             |
| Glycemc status               |                              |                              |
| Normoglycemc                 | Reference                    | Reference                    |
| Prediabetes                  | <b>0.11 (0.05 to 0.17)</b>   | <b>0.08 (0.02 to 0.14)</b>   |
| Diabetes                     | <b>0.40 (0.29 to 0.51)</b>   | <b>0.36 (0.24 to 0.47)</b>   |
| Controlled                   | <b>0.31 (0.18 to 0.43)</b>   | <b>0.25 (0.13 to 0.38)</b>   |
| Uncontrolled                 | <b>0.67 (0.47 to 0.87)</b>   | <b>0.64 (0.44 to 0.84)</b>   |
| Glycemc status $\times$ time |                              |                              |
| Normoglycemc $\times$ time   | Reference                    | Reference                    |
| Prediabetes $\times$ time    | <b>0.02 (0.003 to 0.028)</b> | <b>0.01 (0.001 to 0.027)</b> |
| Diabetes $\times$ time       | <b>0.03 (0.011 to 0.056)</b> | <b>0.03 (0.011 to 0.057)</b> |
| Controlled $\times$ time     | <b>0.03 (0.005 to 0.056)</b> | <b>0.03 (0.002 to 0.055)</b> |
| Uncontrolled $\times$ time   | <b>0.04 (0.002 to 0.087)</b> | <b>0.05 (0.006 to 0.091)</b> |

Model 1 adjusted for baseline age, sex, and education.

Model 2 adjusted for model 1 + body mass index, physical activity, alcohol consumption, smoking status, systolic blood pressure, estimated glomerular filtration rate, high total cholesterol, depression and mood disorders, cerebrovascular diseases, and peripheral neuropathy. Numbers in bold indicate p value <0.05.

**Supplementary Table 4-Sensitivity analyses**

| A. Analysis exclude participants with impairment in chair stand, walking speed, ADL/IADL disability and living in the institutions for each outcome |                            |                                  |                            |
|-----------------------------------------------------------------------------------------------------------------------------------------------------|----------------------------|----------------------------------|----------------------------|
| Glycemic status × time                                                                                                                              | Chair stand                | Walking speed                    | Disability score           |
| Normoglycemia × time                                                                                                                                | Reference                  | Reference                        | Reference                  |
| Prediabetes × time                                                                                                                                  | <b>0.43 (0.11 to 0.74)</b> | <b>-0.006 (-0.009 to -0.002)</b> | <b>0.07 (0.04 to 0.11)</b> |
| Diabetes × time                                                                                                                                     | <b>1.56 (0.96 to 2.14)</b> | <b>-0.011 (-0.019 to -0.004)</b> | <b>0.13 (0.06 to 0.20)</b> |
| Controlled × time                                                                                                                                   | <b>1.15 (0.84 to 2.19)</b> | <b>-0.011 (-0.019 to -0.001)</b> | <b>0.12 (0.04 to 0.19)</b> |
| Uncontrolled × time                                                                                                                                 | <b>1.67 (0.53 to 2.79)</b> | <b>-0.014 (-0.029 to 0.001)</b>  | <b>0.17 (0.04 to 0.29)</b> |
| B. Analysis exclude participants with cerebrovascular disease and peripheral neuropathy                                                             |                            |                                  |                            |
| Glycemic status × time                                                                                                                              | Chair stand                | Walking speed                    | Disability score           |
| Normoglycemia × time                                                                                                                                | Reference                  | Reference                        | Reference                  |
| Prediabetes × time                                                                                                                                  | <b>0.28 (0.01 to 0.57)</b> | <b>-0.005 (-0.009 to -0.002)</b> | <b>0.04 (0.01 to 0.08)</b> |
| Diabetes × time                                                                                                                                     | <b>1.09 (0.57 to 1.60)</b> | <b>-0.009 (-0.017 to -0.002)</b> | <b>0.15 (0.09 to 0.22)</b> |
| Controlled × time                                                                                                                                   | <b>0.99 (0.41 to 1.58)</b> | -0.006 (-0.016 to 0.001)         | <b>0.13 (0.06 to 0.21)</b> |
| Uncontrolled × time                                                                                                                                 | <b>1.38 (0.37 to 2.39)</b> | -0.017 (-0.032 to 0.004)         | <b>0.20 (0.08 to 0.32)</b> |
| C. Analysis exclude participants with MMSE<24 at all waves                                                                                          |                            |                                  |                            |
| Glycemic status × time                                                                                                                              | Chair stand                | Walking speed                    | Disability score           |
| Normoglycemia × time                                                                                                                                | Reference                  | Reference                        | Reference                  |
| Prediabetes × time                                                                                                                                  | <b>0.31 (0.04 to 0.59)</b> | <b>-0.005 (-0.009 to -0.001)</b> | <b>0.03 (0.01 to 0.06)</b> |
| Diabetes × time                                                                                                                                     | <b>1.02 (0.55 to 1.59)</b> | <b>-0.009 (-0.016 to -0.002)</b> | <b>0.08 (0.04 to 0.14)</b> |
| Controlled × time                                                                                                                                   | <b>0.90 (0.37 to 1.55)</b> | <b>-0.009 (-0.017 to -0.001)</b> | <b>0.10 (0.04 to 0.15)</b> |
| Uncontrolled × time                                                                                                                                 | <b>1.40 (0.40 to 2.39)</b> | -0.011 (-0.025 to 0.003)         | 0.05 (-0.04 to 0.13)       |
| D. Analysis include those who completed all follow-ups examinations                                                                                 |                            |                                  |                            |
| Glycemic status × time                                                                                                                              | Chair stand                | Walking speed                    | Disability score           |
| Normoglycemia × time                                                                                                                                | Reference                  | Reference                        | Reference                  |
| Prediabetes × time                                                                                                                                  | 0.28 (-0.07 to 0.56)*      | <b>-0.003 (-0.007 to 0.000)</b>  | <b>0.04 (0.01 to 0.07)</b> |
| Diabetes × time                                                                                                                                     | <b>0.94 (0.38 to 1.50)</b> | <b>-0.008 (-0.016 to -0.001)</b> | <b>0.06 (0.01 to 0.12)</b> |
| Controlled × time                                                                                                                                   | <b>0.89 (0.27 to 1.52)</b> | -0.006 (-0.015 to 0.002)         | <b>0.07 (0.01 to 0.13)</b> |
| Uncontrolled × time                                                                                                                                 | 1.11 (-0.00 to 2.22)**     | <b>-0.016 (-0.032 to -0.001)</b> | 0.03 (-0.07 to 0.14 )      |
| E. Analysis additionally adjust for albumin level                                                                                                   |                            |                                  |                            |
| Glycemic status × time                                                                                                                              | Chair stand                | Walking speed                    | Disability score           |
| Normoglycemia × time                                                                                                                                | Reference                  | Reference                        | Reference                  |

|                     |                          |                                |                          |
|---------------------|--------------------------|--------------------------------|--------------------------|
| Prediabetes × time  | <b>0.34 (0.07, 0.62)</b> | <b>-0.006 (-0.009, -0.002)</b> | <b>0.06 (0.03, 0.10)</b> |
| Diabetes × time     | <b>1.08 (0.57, 1.59)</b> | <b>-0.009 (-0.015, -0.002)</b> | <b>0.14 (0.07, 0.21)</b> |
| Controlled × time   | <b>0.96 (0.30, 1.62)</b> | -0.007 (-0.014, 0.001)         | <b>0.12 (0.04, 0.19)</b> |
| Uncontrolled × time | <b>1.48 (0.42, 2.55)</b> | <b>-0.014 (-0.028, -0.001)</b> | <b>0.20 (0.08, 0.33)</b> |

\*p=0.056 \*\*p=0.051 Model adjusted for age, sex, education, body mass index, physical activity, alcohol consumption, smoking status, systolic blood pressure, high total cholesterol, estimated glomerular filtration rate, depression and mood disorders, cerebrovascular disease, and peripheral neuropathy when it is available. For prediabetes as exposures, models were additionally adjusted for incident diabetes. Numbers in bold indicate p value <0.05.
